# Supplementary material
Source: PubMed Central journal article supplement (PMC4788039)
Supplement: hodj840595.ww2_default.pdf [file hodj840595.ww2_default.pdf]

## Appendix 2: Search strategy

Medline search strategy:

1. hypertension/ or hypertension, malignant/ or exp hypertension, renal/
2. hypertens\*.tw.
3. 1 or 2
4. Blood Pressure/
5. exp Blood Pressure Determination/
6. exp Sphygmomanometers/
7. (sphygmomanometer\* or (blood pressure adj3 (monitor\* or determin\*))).tw.
8. 6 or 5 or 4 or 7
9. Ambulatory Care/
10. ambulatory care facilities/ or outpatient clinics, hospital/
11. Family Practice/
12. Monitoring, Ambulatory/
13. Physicians, Family/
14. "Referral and Consultation"/
15. (family practi\* or general practi\* or family physician\* or primary care).tw.
16. (ambula\* adj5 care).tw.
17. (referral\* adj5 consultat\*).tw.
18. 13 or 9 or 11 or 14 or 17 or 16 or 10 or 12 or 15
19. 8 and 3
20. 8 and 3 and 18
21. diagnos\*.tw.
22. (physical exam\* or clinical exam\*).tw.
23. stress test\*.tw.
24. (sensitiv\* or specific\* or predictive value\* or ppv or npv or likelihood ratio\* or interobserver or intraobserver).tw.
25. (accuracy or precision or reliability or validity).tw.
26. "Diagnostic Techniques and Procedures"/
27. exp Diagnostic Errors/
28. Diagnostic Tests, Routine/
29. exp "Sensitivity and Specificity"/
30. diagnosis/ or diagnosis, differential/
31. 25 or 23 or 30 or 26 or 24 or 22 or 28 or 21 or 29 or 27
32. 31 and 20
33. Hypertension/di [Diagnosis]
34. Hypertension, Malignant/di [Diagnosis]
35. 33 or 34
36. 8 and 18
37. 35 and 36
38. limit 20 to "diagnosis (sensitivity)"
39. 38 or 32 or 37

The searches on Trip, Medion and Arif were conducted by looking for "blood pressure" in the titles.
