# Supplementary material
Source: PubMed Central journal article supplement (PMC4788039)
Supplement: hodj840595.ww3_default.pdf [file hodj840595.ww3_default.pdf]

## **Appendix 3: Data Extraction Sheet**

**Name of reviewer**

**Date of review**

### **A. Details of the Paper**

**1. ID number of paper**

**2. Author**

**3. Title**

**4. Year**

**5. Source (e.g. journal title, website)**

**6. Identification of report**

Electronic database (please specify)

Citation

Contact

Other/ Unknown

**7. Status**

Published

In press

Unpublished

### **B. Population of the Study**

**1. Country of study**

**2. Age of the population group** (please specify mean age if recorded)

**3. Gender of the population group**

**Males:            Females:**

**4. Ethnicity of the population group**

**5. Any other important details about the population group**

**6. Inclusion criteria**

**7. Exclusions**

**8. Setting for monitoring** (office/ clinic reading)

- Primary care
- Secondary care
- Other (please specify)

**C. Methodological Quality of the Study**

**1. What was the sampling frame?**

- General population screening/ everyone on practice list
- Primary care subgroup considered at risk of hypertension
- Secondary care subgroup considered at risk of hypertension

Please specify details of the subgroup if relevant

**2. How were the participants selected?**

- Consecutively
- Randomly
- Neither consecutively nor randomly
- Unsure (please specify)

**3. What was the planned sample size?**

**4. What is the proportion of those selected for the study that actually completed the study with full follow up data (i.e. actual sample size)?**

**5. Do the authors provide any information on whether and/or how those who dropped out of the study differ from those who remained in the study?**

- N/A (no drop outs)
- Yes
- No

**6. Design of study**

- Cross-sectional
- Other design (please specify)

**7. Did either the whole sample, or a random selection of the sample, receive the same comparison measurement tests?**

- Yes
- No
- Unclear

**8. Were patients subject to the same comparison measurement tests regardless of the result of the initial measurement test?**

- Yes

No   
 Unclear

**9. Were those taking BP measurements blinded to the previous results of BP monitoring?**

Yes   
 No   
 Unsure

**10. Were patients blinded to the previous results of BP monitoring?**

Yes   
 No   
 Unsure

**11. Were uninterpretable measurement results reported to avoid exclusion bias?**

Yes   
 No   
 Unclear

**D. Details of the Intervention**

**1. Comparison**

Clinic vs. Home   
 Clinic vs. Ambulatory   
 Home vs. Ambulatory   
 Clinic vs. Home vs. Ambulatory   
 Other comparison of BP measurements (please specify)

**2. Details of the monitoring.**

|                                                  | <b>Clinic</b> | <b>Ambulatory</b> | <b>Home</b> |
|--------------------------------------------------|---------------|-------------------|-------------|
| <b>Definition of monitoring used</b>             |               |                   |             |
| <b>Frequency of measurement</b>                  |               |                   |             |
| <b>Number of measurements used</b>               |               |                   |             |
| <b>Who carried out the monitoring</b>            |               |                   |             |
| <b>Types of monitor used</b>                     |               |                   |             |
| <b>Time of day of measurement</b>                |               |                   |             |
| <b>Which arm was used</b>                        |               |                   |             |
| <b>Was the patient rested before measurement</b> |               |                   |             |

|                                                   |  |  |  |
|---------------------------------------------------|--|--|--|
| <b>Summary statistic used in each measurement</b> |  |  |  |
|---------------------------------------------------|--|--|--|

**3. Was the execution of the tests described in sufficient detail to permit replication of the test?**

- Yes
- No
- Unclear

**4. What was the order of the measurements?**

- Randomised
- Set pattern
- Other (please specify)

**5. What was the time period between the different methods of measurements?**

**6. For home readings, how were these checked for accuracy?**

- Patient-recorded
- Use of memory function on device
- Telemonitoring
- Other (please specify)
- N/A (no home monitoring)

**7. Threshold used to diagnose hypertension**

*Clinic*

*Ambulatory*

*Home*

**8. Was calculation of risk taken into account in deciding the appropriate threshold to use?**

- Yes (please specify)
- No

**9. Was any sensitivity analysis using different thresholds carried out?**

- Yes (please specify)
- No

**10. What are the results of the study as reported by the authors? (Please give details - numbers of patients with percentages in parentheses in each cell in the table - as these relate to the performance characteristics of the 3 BP monitoring methods in 2x2 tables, adding in the threshold used, and refer to page numbers in the report of the study where necessary)**

**Clinic vs. Home**

Threshold used for clinic:

Threshold used for home:

| Hypertensive? | Clinic Yes | Clinic No | Total |
|---------------|------------|-----------|-------|
| Home Yes      |            |           |       |
| Home No       |            |           |       |
| Total         |            |           |       |

### **Clinic vs. Ambulatory**

Threshold used for clinic:

Threshold used for ambulatory:

| Hypertensive?  | Clinic Yes | Clinic No | Total |
|----------------|------------|-----------|-------|
| Ambulatory Yes |            |           |       |
| Ambulatory No  |            |           |       |
| Total          |            |           |       |

### **Ambulatory vs. Home**

Threshold used for ambulatory:

Threshold used for home:

| Hypertensive? | Ambulatory Yes | Ambulatory No | Total |
|---------------|----------------|---------------|-------|
| Home Yes      |                |               |       |
| Home No       |                |               |       |
| Total         |                |               |       |

If a sensitivity analysis using different diagnostic thresholds was carried out, please input the results of this below:

### **Clinic vs. Home**

Threshold used for clinic:

Threshold used for home:

| Hypertensive? | Clinic Yes | Clinic No | Total |
|---------------|------------|-----------|-------|
| Home Yes      |            |           |       |
| Home No       |            |           |       |
| Total         |            |           |       |

### **Clinic vs. Ambulatory**

Threshold used for clinic:

Threshold used for ambulatory:

| Hypertensive?  | Clinic Yes | Clinic No | Total |
|----------------|------------|-----------|-------|
| Ambulatory Yes |            |           |       |
| Ambulatory No  |            |           |       |
| Total          |            |           |       |

### **Ambulatory vs. Home**

Threshold used for ambulatory:

Threshold used for home:

| Hypertensive? | Ambulatory Yes | Ambulatory No | Total |
|---------------|----------------|---------------|-------|
| Home Yes      |                |               |       |
| Home No       |                |               |       |
| Total         |                |               |       |

**11. What was the mean blood pressure across all the included participants? (Please include sensitivity analysis results if available)**

*Clinic*

*Ambulatory*

*Home*

**12. Are sensitivity and specificity data quoted in the paper?**

Yes (please specify page ref)

No
